# Supplementary material for: Sprayable, thermosensitive hydrogels for promoting wound healing based on hollow, porous and pH-sensitive ZnO microspheres
Source: Royal Society of Chemistry journal article supplement (doi:10.1039/d4tb00961d), 2024-01-01
Supplement: d4tb00961d1.pdf [file d4tb00961d1.pdf]

## Supporting information

### Sprayable, thermosensitive hydrogels for promoting wound healing based on hollow, porous and pH-sensitive ZnO microspheres

Wei Zhang<sup>a, b, c#</sup>, Hongshu Jing<sup>a#</sup>, Qiang Niu<sup>b</sup>, Zhihua Wu<sup>a</sup>, Ying Sun<sup>a</sup>, Yourong Duan<sup>a\*</sup>, Xianwen Wang<sup>b\*</sup>

<sup>a</sup> State Key Laboratory of Systems Medicine for Cancer, Shanghai Cancer Institute, Renji Hospital, School of Medicine, Shanghai Jiao Tong University, Shanghai 200032, P. R. China

<sup>b</sup> College of Biomedical Engineering, Anhui Medical University, Hefei 230032, P. R. China

<sup>c</sup> Institute of Clinical Pharmacology, Anhui Medical University, Hefei 230032, P. R. China

#### \*Corresponding Authors.

*E-mail addresses:* [xianwenwang@ahmu.edu.cn](mailto:xianwenwang@ahmu.edu.cn) (X. Wang); [yrduan@shsci.org](mailto:yrduan@shsci.org) (Y. Duan)

# These authors contributed equally to this work.

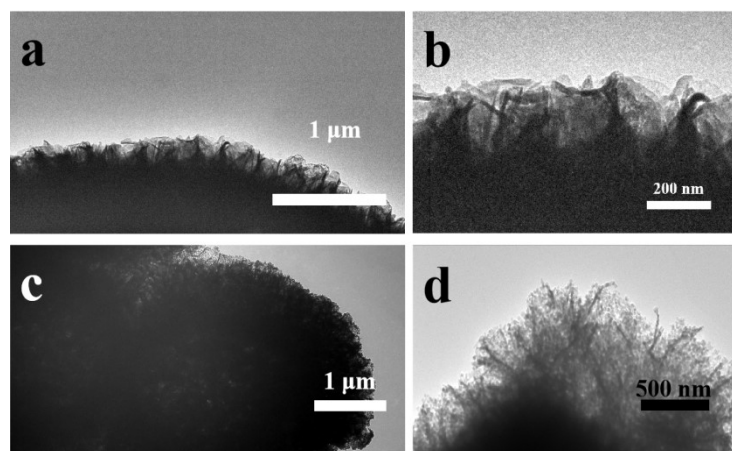

**Figure S1.** (a), (b) TEM image of Zn(OH)F microspheres. (c), (d) TEM image of ZnO microspheres.

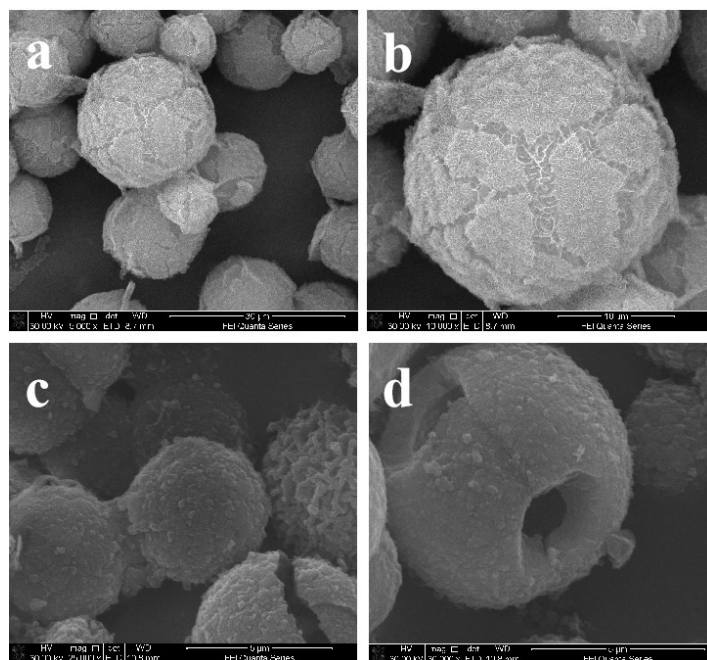

**Figure S2.** (a), (b) SEM image of ZnO absorbed sodium alginate. (c), (d) SEM image of ZnO absorbed chitosan oligosaccharide.

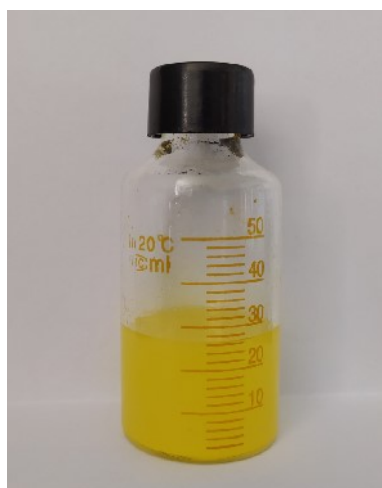

**Figure S3.** Digital photograph of aqueous dispersion of nanoparticles of CNPs.

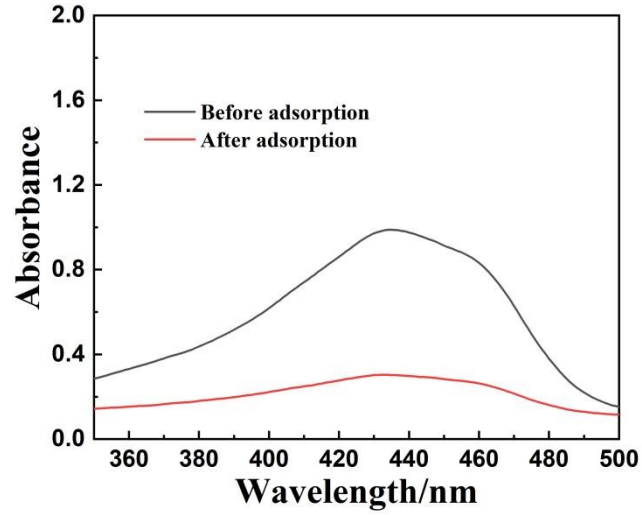

Figure S4. UV-vis absorption spectrums of water dispersion of CNPs before and after adsorption.

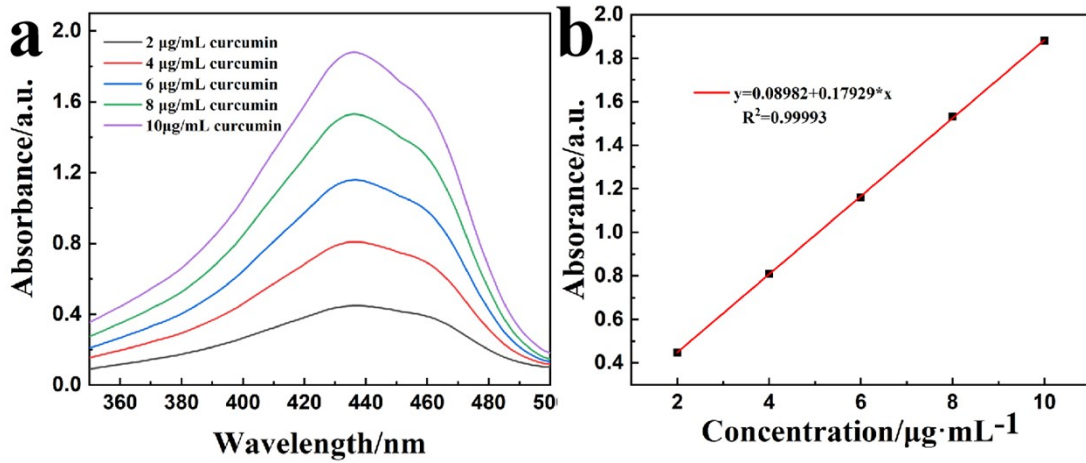

Figure S5. (a) UV-vis absorption spectrums of different concentrations of curcumin. (b) The standard curve and regression equation of curcumin.
